# Supplementary material
Source: PubMed Central journal article supplement (PMC6317346)
Supplement: NIHMS996911-supplement-Fig_S1__Table_S1.pdf [file NIHMS996911-supplement-Fig_S1__Table_S1.pdf]

Supplementary Figure S1. Sampling methodology of NHANES respondents.

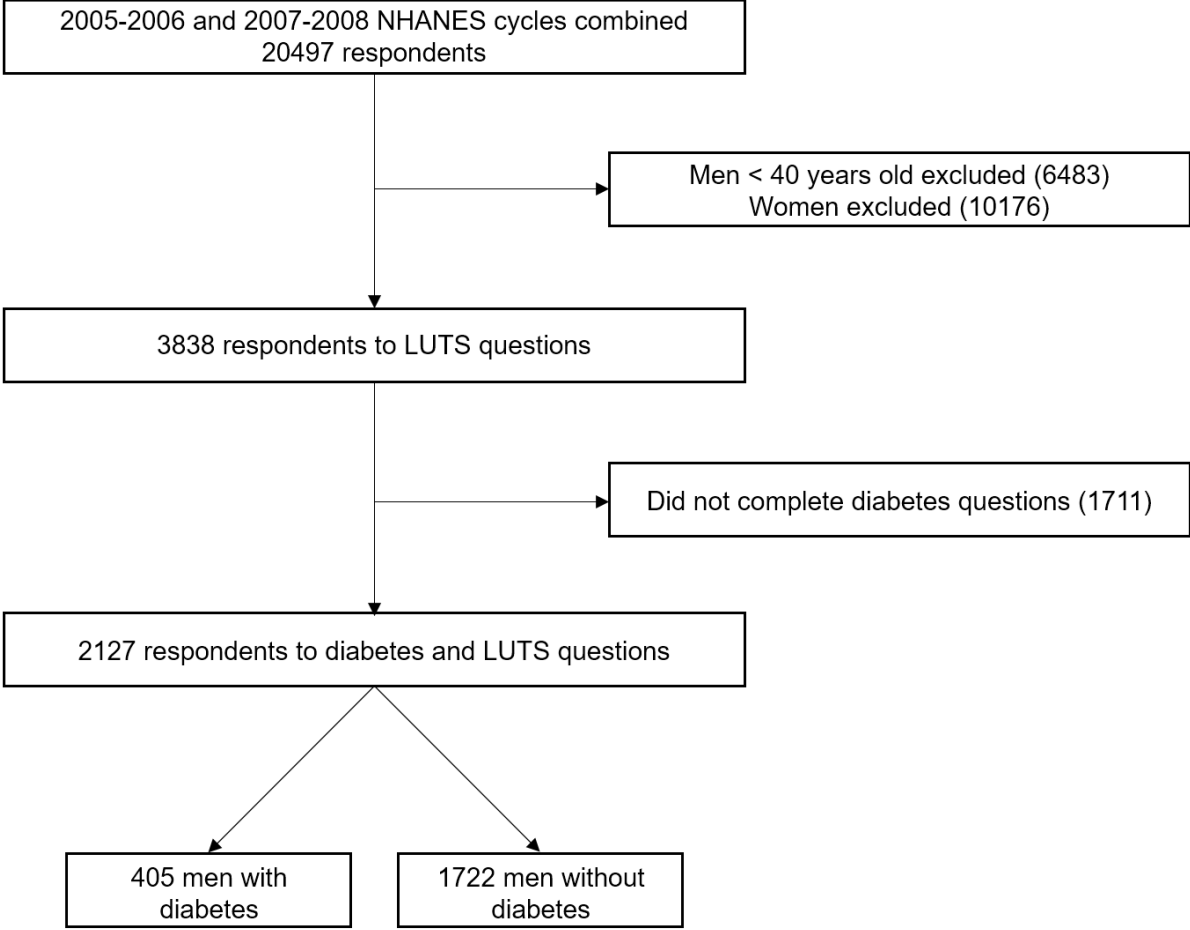

Supplementary Table S1 - Univariate analysis of demographic, biomarker, and questionnaire variables based on DM and non-DM status

|                                  | Non-diabetic<br>N = 1722 | Diabetic<br>N = 405 | P-value |
|----------------------------------|--------------------------|---------------------|---------|
| <i>Demographics</i>              |                          |                     |         |
|                                  | Mean ( $\pm$ SD)         | Mean ( $\pm$ SD)    |         |
| Age                              | 35.26 (21.49)            | 58.24 (15.44)       | <0.0001 |
| BMI                              | 25.95 (7.10)             | 32.42 (7.78)        | <0.0001 |
|                                  | %                        | %                   |         |
| Current/former smoker            | 50.52                    | 33.28               | <0.0001 |
| Current/former alcoholic         | 15.58                    | 19.77               | <0.0001 |
| <i>Biomarkers</i>                |                          |                     |         |
|                                  | Mean ( $\pm$ SD)         | Mean ( $\pm$ SD)    |         |
| PSA                              | 1.49 (2.40)              | 1.67 (2.72)         | 0.2047  |
| Random plasma glucose (mg/dL)    | 92.30 (19.15)            | 156.07 (74.87)      | <0.0001 |
| Fasting plasma glucose** (mg/dL) | 98.81 (15.51)            | 161.19 (73.73)      | <0.0001 |
| Fasting insulin** (uU/mL)        | 11.17 (9.38)             | 15.13 (13.24)       | <0.0001 |
| Hemoglobin A1c (%)               | 5.33 (0.53)              | 7.23 (1.71)         | <0.0001 |
| Serum Creatinine (mg/dL)         | 0.87 (0.27)              | 1.01 (0.56)         | <0.0001 |
| Urine Protein/Creatinine         | 0.02 (0.17)              | 0.19 (0.86)         | <0.0001 |
| BUN (mg/dL)                      | 12.21 (4.71)             | 16.31 (8.50)        | <0.0001 |
| Hemoglobin (g/dL)                | 14.23 (1.50)             | 13.90 (1.54)        | <0.0001 |
| Bicarbonate (mmol/L)             | 24.75 (2.29)             | 24.84 (2.44)        | 0.2359  |
| Total Cholesterol (mg/dL)        | 191.17 (41.58)           | 186.87 (47.78)      | 0.0032  |
| LDL** (mg/dL)                    | 112.36 (34.80)           | 100.65 (37.17)      | <0.0001 |
| HDL** (mg/dL)                    | 54.73 (15.57)            | 50.25 (14.76)       | <0.0001 |
| Triglycerides** (mmol/L)         | 126.44 (96.23)           | 183.88 (190.03)     | <0.0001 |
| WBC (1000 cells/uL)              | 7.32 (2.23)              | 7.75 (2.86)         | <0.0001 |
| C-reactive Protein (mg/dL)       | 0.35 (0.79)              | 0.56 (0.75)         | <0.0001 |
